# Supplementary material for: Bladder-cancer-associated mutations in RXRA activate peroxisome proliferator-activated receptors to drive urothelial proliferation
Source: eLife. 2017 Nov 16;6:e30862. doi: 10.7554/eLife.30862 (PMC5720590; doi:10.7554/eLife.30862)
Supplement: Figure 1—source data 1. — Pathways over-represented in genes up-regulated by RXRAS427Fcompared to RXRAwtin either JMSU-1 or 575A. Analysis was also done using genes up-regulated in both cell lines. [file elife-30862-fig1-data1.xlsx]

## Sheet: JMSU-1
GO-Elite ORA Results
File:
Table:
colors:
2017-04-19
Homo sapiens
Pvalues = true
Calculation Summary:
63 Ensembl source identifiers supplied in the input file:041917jmsu1induced2input.txt
63 source identifiers meeting the filter linked to a Ensembl ID.
30 genes meeting the criterion linked to a term.
17337 source identifiers in this dataset.
17337 source identifiers linked to a Ensembl ID.
5279 Genes linked to a term.
The z score is based on an N of 5279 and a R of 30 distinct genes in all terms.
Gene-Set Name	Number Changed	Number Measured	Number in Gene-Set	Percent Changed	Percent Present	Z Score	PermuteP	AdjustedP
PPAR signaling pathway:KEGG-hsa03320	7	67	78	10.4478	85.8974	10.8257	0	0.1145
Hematopoietic cell lineage:KEGG-hsa04640	4	77	126	5.19481	61.1111	5.44003	0	0.1145
Rheumatoid arthritis:KEGG-hsa05323	4	81	191	4.93827	42.4084	5.2722	0	0.1145
Antigen processing and presentation:KEGG-hsa04612	4	89	441	4.49438	20.1814	4.96889	0	0.1145
Asthma:KEGG-hsa05310	2	27	109	7.40741	24.7706	4.73922	0.0035	0.1145
Adipocytokine signaling pathway:KEGG-hsa04920	3	66	92	4.54545	71.7391	4.32503	0.0035	0.1145
Fat digestion and absorption:KEGG-hsa04975	2	35	53	5.71429	66.0377	4.06312	0.004	0.1145
Synthesis and degradation of ketone bodies:KEGG-hsa00072	1	10	11	10	90.9091	3.97113	0.0335	0.30686
ECM-receptor interaction:KEGG-hsa04512	3	81	118	3.7037	68.6441	3.78274	0.0055	0.12595
Fatty acid metabolism:KEGG-hsa00071	2	40	45	5	88.8889	3.74252	0.01	0.176154
Vasopressin-regulated water reabsorption:KEGG-hsa04962	2	44	48	4.54545	91.6667	3.52394	0.0085	0.176154
Intestinal immune network for IgA production:KEGG-hsa04672	2	45	126	4.44444	35.7143	3.47359	0.015	0.192842
Staphylococcus aureus infection:KEGG-hsa05150	2	48	173	4.16667	27.7457	3.33137	0.0135	0.192842
Tuberculosis:KEGG-hsa05152	4	163	288	2.45399	56.5972	3.25303	0.0035	0.1145
Graft-versus-host disease:KEGG-hsa05332	2	50	284	4	17.6056	3.2432	0.0135	0.192842
Phagosome:KEGG-hsa04145	4	168	314	2.38095	53.5032	3.17619	0.0055	0.12595
Allograft rejection:KEGG-hsa05330	2	52	157	3.84615	33.121	3.15976	0.013	0.192842
Terpenoid backbone biosynthesis:KEGG-hsa00900	1	15	18	6.66667	83.3333	3.14622	0.058	0.510846
Type I diabetes mellitus:KEGG-hsa04940	2	57	167	3.50877	34.1317	2.9691	0.0155	0.192842
Autoimmune thyroid disease:KEGG-hsa05320	2	57	165	3.50877	34.5455	2.9691	0.016	0.192842
Toxoplasmosis:KEGG-hsa05145	3	130	252	2.30769	51.5873	2.67115	0.01	0.176154
Leishmaniasis:KEGG-hsa05140	2	70	167	2.85714	41.9162	2.56435	0.0285	0.283761
Salivary secretion:KEGG-hsa04970	2	71	96	2.8169	73.9583	2.53744	0.031	0.295792
Cell adhesion molecules (CAMs):KEGG-hsa04514	3	146	254	2.05479	57.4803	2.42295	0.0185	0.211825
Viral myocarditis:KEGG-hsa05416	2	81	194	2.46914	41.7526	2.29329	0.0275	0.283761
Galactose metabolism:KEGG-hsa00052	1	25	32	4	78.125	2.28783	0.0855	0.675155
Butanoate metabolism:KEGG-hsa00650	1	27	32	3.7037	84.375	2.17271	0.0835	0.675155
Primary immunodeficiency:KEGG-hsa05340	1	30	79	3.33333	37.9747	2.02028	0.1005	0.742403
Alanine, aspartate and glutamate metabolism:KEGG-hsa00250	1	30	34	3.33333	88.2353	2.02028	0.098	0.742403
Cytokine-cytokine receptor interaction:KEGG-hsa04060	3	194	334	1.54639	58.0838	1.84641	0.026	0.283524
Carbohydrate digestion and absorption:KEGG-hsa04973	1	36	53	2.77778	67.9245	1.76946	0.123	0.880219
Systemic lupus erythematosus:KEGG-hsa05322	2	114	247	1.75439	46.1538	1.70304	0.076	0.644593
Malaria:KEGG-hsa05144	1	43	66	2.32558	65.1515	1.5391	0.155	0.940105
Valine, leucine and isoleucine degradation:KEGG-hsa00280	1	45	50	2.22222	90	1.48216	0.15	0.940105
Arachidonic acid metabolism:KEGG-hsa00590	1	46	62	2.17391	74.1935	1.45491	0.156	0.940105
Amino sugar and nucleotide sugar metabolism:KEGG-hsa00520	1	47	51	2.12766	92.1569	1.42841	0.1555	0.940105
ABC transporters:KEGG-hsa02010	1	47	62	2.12766	75.8065	1.42841	0.154	0.940105
Arginine and proline metabolism:KEGG-hsa00330	1	52	59	1.92308	88.1356	1.30597	0.177	0.991402
Amyotrophic lateral sclerosis (ALS):KEGG-hsa05014	1	54	68	1.85185	79.4118	1.26113	0.1715	0.991402
Acute myeloid leukemia:KEGG-hsa05221	1	58	72	1.72414	80.5556	1.1774	0.1775	0.991402
Complement and coagulation cascades:KEGG-hsa04610	1	59	119	1.69492	49.5798	1.1576	0.205	1
RIG-I-like receptor signaling pathway:KEGG-hsa04622	1	61	87	1.63934	70.1149	1.11921	0.2045	1
Long-term depression:KEGG-hsa04730	1	63	79	1.5873	79.7468	1.08235	0.1895	1
Protein digestion and absorption:KEGG-hsa04974	1	73	98	1.36986	74.4898	0.917361	0.2285	1
Peroxisome:KEGG-hsa04146	1	78	85	1.28205	91.7647	0.844782	0.264	1
Focal adhesion:KEGG-hsa04510	2	198	244	1.0101	81.1475	0.842913	0.1425	0.940105
Toll-like receptor signaling pathway:KEGG-hsa04620	1	87	131	1.14943	66.4122	0.727038	0.2615	1
Prostate cancer:KEGG-hsa05215	1	89	105	1.1236	84.7619	0.702799	0.245	1
Melanogenesis:KEGG-hsa04916	1	94	110	1.06383	85.4545	0.644846	0.274	1
Amoebiasis:KEGG-hsa05146	1	98	138	1.02041	71.0145	0.600961	0.2975	1
Jak-STAT signaling pathway:KEGG-hsa04630	1	131	184	0.763359	71.1957	0.300741	0.36	1
Calcium signaling pathway:KEGG-hsa04020	1	161	191	0.621118	84.2932	0.0905564	0.46	1
Alzheimer's disease:KEGG-hsa05010	1	164	200	0.609756	82	0.0717605	0.4425	1
Huntington's disease:KEGG-hsa05016	1	183	205	0.546448	89.2683	-0.0400017	0.492	1
Biotin metabolism:KEGG-hsa00780	0	2	2	0	100	-0.106925	1	1
Lysine biosynthesis:KEGG-hsa00300	0	3	3	0	100	-0.130968	1	1
Lipoic acid metabolism:KEGG-hsa00785	0	3	3	0	100	-0.130968	1	1
Thiamine metabolism:KEGG-hsa00730	0	4	5	0	80	-0.151243	1	1
D-Glutamine and D-glutamate metabolism:KEGG-hsa00471	0	4	4	0	100	-0.151243	1	1
Phenylalanine, tyrosine and tryptophan biosynthesis:KEGG-hsa00400	0	5	5	0	100	-0.169111	1	1
Butirosin and neomycin biosynthesis:KEGG-hsa00524	0	5	6	0	83.3333	-0.169111	1	1
Vitamin B6 metabolism:KEGG-hsa00750	0	6	6	0	100	-0.185269	1	1
Glycosaminoglycan biosynthesis - heparan sulfate:KEGG-hsa00534	0	6	8	0	75	-0.185269	1	1
Cyanoamino acid metabolism:KEGG-hsa00460	0	6	7	0	85.7143	-0.185269	1	1
Caffeine metabolism:KEGG-hsa00232	0	6	7	0	85.7143	-0.185269	1	1
Biosynthesis of unsaturated fatty acids:KEGG-hsa01040	0	6	6	0	100	-0.185269	1	1
Ubiquinone and other terpenoid-quinone biosynthesis:KEGG-hsa00130	0	7	7	0	100	-0.200133	1	1
Fatty acid biosynthesis:KEGG-hsa00061	0	7	7	0	100	-0.200133	1	1
Neuroactive ligand-receptor interaction:KEGG-hsa04080	1	218	291	0.458716	74.9141	-0.219788	0.564	1
Endocytosis:KEGG-hsa04144	1	218	270	0.458716	80.7407	-0.219788	0.536	1
Fatty acid elongation in mitochondria:KEGG-hsa00062	0	9	16	0	56.25	-0.226972	1	1
Ascorbate and aldarate metabolism:KEGG-hsa00053	0	9	32	0	28.125	-0.226972	1	1
Sulfur relay system:KEGG-hsa04122	0	10	11	0	90.9091	-0.239273	1	1
Taurine and hypotaurine metabolism:KEGG-hsa00430	0	11	11	0	100	-0.250975	1	1
Riboflavin metabolism:KEGG-hsa00740	0	11	12	0	91.6667	-0.250975	1	1
Sulfur metabolism:KEGG-hsa00920	0	12	14	0	85.7143	-0.26216	1	1
Non-homologous end-joining:KEGG-hsa03450	0	12	18	0	66.6667	-0.26216	1	1
Glycosaminoglycan biosynthesis - chondroitin sulfate:KEGG-hsa00532	0	13	14	0	92.8571	-0.27289	1	1
Folate biosynthesis:KEGG-hsa00790	0	13	13	0	100	-0.27289	1	1
alpha-Linolenic acid metabolism:KEGG-hsa00592	0	14	21	0	66.6667	-0.283219	1	1
Glycosphingolipid biosynthesis - globo series:KEGG-hsa00603	0	14	15	0	93.3333	-0.283219	1	1
Glycosphingolipid biosynthesis - ganglio series:KEGG-hsa00604	0	14	19	0	73.6842	-0.283219	1	1
Valine, leucine and isoleucine biosynthesis:KEGG-hsa00290	0	15	18	0	83.3333	-0.293187	1	1
Renin-angiotensin system:KEGG-hsa04614	0	15	17	0	88.2353	-0.293187	1	1
Pentose and glucuronate interconversions:KEGG-hsa00040	0	15	38	0	39.4737	-0.293187	1	1
Selenocompound metabolism:KEGG-hsa00450	0	16	18	0	88.8889	-0.302831	1	1
Primary bile acid biosynthesis:KEGG-hsa00120	0	16	17	0	94.1176	-0.302831	1	1
Phenylalanine metabolism:KEGG-hsa00360	0	17	19	0	89.4737	-0.312181	1	1
Glyoxylate and dicarboxylate metabolism:KEGG-hsa00630	0	17	18	0	94.4444	-0.312181	1	1
Glycosaminoglycan degradation:KEGG-hsa00531	0	17	19	0	89.4737	-0.312181	1	1
Pantothenate and CoA biosynthesis:KEGG-hsa00770	0	18	19	0	94.7368	-0.321262	1	1
Steroid biosynthesis:KEGG-hsa00100	0	19	20	0	95	-0.330097	1	1
One carbon pool by folate:KEGG-hsa00670	0	19	23	0	82.6087	-0.330097	1	1
Maturity onset diabetes of the young:KEGG-hsa04950	0	21	29	0	72.4138	-0.347101	1	1
Vitamin digestion and absorption:KEGG-hsa04977	0	22	28	0	78.5714	-0.355303	1	1
Regulation of autophagy:KEGG-hsa04140	0	22	34	0	64.7059	-0.355303	1	1
Proximal tubule bicarbonate reclamation:KEGG-hsa04964	0	22	25	0	88	-0.355303	1	1
Linoleic acid metabolism:KEGG-hsa00591	0	22	31	0	70.9677	-0.355303	1	1
Circadian rhythm - mammal:KEGG-hsa04710	0	22	22	0	100	-0.355303	1	1
Protein export:KEGG-hsa03060	0	23	23	0	100	-0.363323	1	1
Phototransduction:KEGG-hsa04744	0	23	29	0	79.3103	-0.363323	1	1
Nitrogen metabolism:KEGG-hsa00910	0	23	25	0	92	-0.363323	1	1
Glycosphingolipid biosynthesis - lacto and neolacto series:KEGG-hsa00601	0	23	26	0	88.4615	-0.363323	1	1
Mismatch repair:KEGG-hsa03430	0	24	30	0	80	-0.371173	1	1
Glycosylphosphatidylinositol(GPI)-anchor biosynthesis:KEGG-hsa00563	0	24	26	0	92.3077	-0.371173	1	1
Dorso-ventral axis formation:KEGG-hsa04320	0	24	34	0	70.5882	-0.371173	1	1
Porphyrin and chlorophyll metabolism:KEGG-hsa00860	0	25	50	0	50	-0.378863	1	1
Nicotinate and nicotinamide metabolism:KEGG-hsa00760	0	25	27	0	92.5926	-0.378863	1	1
Collecting duct acid secretion:KEGG-hsa04966	0	25	36	0	69.4444	-0.378863	1	1
beta-Alanine metabolism:KEGG-hsa00410	0	27	28	0	96.4286	-0.393801	1	1
Mucin type O-Glycan biosynthesis:KEGG-hsa00512	0	27	30	0	90	-0.393801	1	1
Histidine metabolism:KEGG-hsa00340	0	27	30	0	90	-0.393801	1	1
Pentose phosphate pathway:KEGG-hsa00030	0	28	30	0	93.3333	-0.401065	1	1
Taste transduction:KEGG-hsa04742	0	29	73	0	39.726	-0.408203	1	1
Steroid hormone biosynthesis:KEGG-hsa00140	0	29	71	0	40.8451	-0.408203	1	1
Homologous recombination:KEGG-hsa03440	0	29	35	0	82.8571	-0.408203	1	1
Starch and sucrose metabolism:KEGG-hsa00500	0	30	64	0	46.875	-0.415221	1	1
RNA polymerase:KEGG-hsa03020	0	30	37	0	81.0811	-0.415221	1	1
Citrate cycle (TCA cycle):KEGG-hsa00020	0	30	34	0	88.2353	-0.415221	1	1
African trypanosomiasis:KEGG-hsa05143	0	30	50	0	60	-0.415221	1	1
Glycine, serine and threonine metabolism:KEGG-hsa00260	0	31	35	0	88.5714	-0.422125	1	1
Ether lipid metabolism:KEGG-hsa00565	0	31	38	0	81.5789	-0.422125	1	1
Drug metabolism - other enzymes:KEGG-hsa00983	0	31	60	0	51.6667	-0.422125	1	1
Thyroid cancer:KEGG-hsa05216	0	33	42	0	78.5714	-0.435612	1	1
Propanoate metabolism:KEGG-hsa00640	0	33	33	0	100	-0.435612	1	1
Base excision repair:KEGG-hsa03410	0	33	36	0	91.6667	-0.435612	1	1
SNARE interactions in vesicular transport:KEGG-hsa04130	0	36	38	0	94.7368	-0.455112	1	1
Prion diseases:KEGG-hsa05020	0	36	55	0	65.4545	-0.455112	1	1
Aldosterone-regulated sodium reabsorption:KEGG-hsa04960	0	36	47	0	76.5957	-0.455112	1	1
Tyrosine metabolism:KEGG-hsa00350	0	37	42	0	88.0952	-0.461434	1	1
Tryptophan metabolism:KEGG-hsa00380	0	37	43	0	86.0465	-0.461434	1	1
Fructose and mannose metabolism:KEGG-hsa00051	0	37	39	0	94.8718	-0.461434	1	1
DNA replication:KEGG-hsa03030	0	37	42	0	88.0952	-0.461434	1	1
Cysteine and methionine metabolism:KEGG-hsa00270	0	37	39	0	94.8718	-0.461434	1	1
Retinol metabolism:KEGG-hsa00830	0	38	69	0	55.0725	-0.467672	1	1
Sphingolipid metabolism:KEGG-hsa00600	0	39	52	0	75	-0.473831	1	1
Pyruvate metabolism:KEGG-hsa00620	0	40	42	0	95.2381	-0.479913	1	1
Bladder cancer:KEGG-hsa05219	0	43	52	0	82.6923	-0.497727	1	1
Type II diabetes mellitus:KEGG-hsa04930	0	44	63	0	69.8413	-0.50353	1	1
Notch signaling pathway:KEGG-hsa04330	0	44	55	0	80	-0.50353	1	1
Metabolism of xenobiotics by cytochrome P450:KEGG-hsa00980	0	44	79	0	55.6962	-0.50353	1	1
Proteasome:KEGG-hsa03050	0	45	62	0	72.5806	-0.509268	1	1
Glutathione metabolism:KEGG-hsa00480	0	46	57	0	80.7018	-0.514945	1	1
Endocrine and other factor-regulated calcium reabsorption:KEGG-hsa04961	0	46	52	0	88.4615	-0.514945	1	1
Drug metabolism - cytochrome P450:KEGG-hsa00982	0	46	84	0	54.7619	-0.514945	1	1
Aminoacyl-tRNA biosynthesis:KEGG-hsa00970	0	46	53	0	86.7925	-0.514945	1	1
Basal transcription factors:KEGG-hsa03022	0	47	58	0	81.0345	-0.520562	1	1
Nucleotide excision repair:KEGG-hsa03420	0	48	67	0	71.6418	-0.526121	1	1
Mineral absorption:KEGG-hsa04978	0	48	56	0	85.7143	-0.526121	1	1
N-Glycan biosynthesis:KEGG-hsa00510	0	49	50	0	98	-0.531624	1	1
Cytosolic DNA-sensing pathway:KEGG-hsa04623	0	49	69	0	71.0145	-0.531624	1	1
mTOR signaling pathway:KEGG-hsa04150	0	51	62	0	82.2581	-0.542468	1	1
Vibrio cholerae infection:KEGG-hsa05110	0	51	67	0	76.1194	-0.542468	1	1
Glycerolipid metabolism:KEGG-hsa00561	0	51	60	0	85	-0.542468	1	1
Basal cell carcinoma:KEGG-hsa05217	0	52	63	0	82.5397	-0.547813	1	1
NOD-like receptor signaling pathway:KEGG-hsa04621	0	53	78	0	67.9487	-0.553108	1	1
Hedgehog signaling pathway:KEGG-hsa04340	0	53	61	0	86.8852	-0.553108	1	1
Lysine degradation:KEGG-hsa00310	0	54	56	0	96.4286	-0.558355	1	1
Endometrial cancer:KEGG-hsa05213	0	54	68	0	79.4118	-0.558355	1	1
Non-small cell lung cancer:KEGG-hsa05223	0	58	75	0	77.3333	-0.578888	1	1
Glycolysis / Gluconeogenesis:KEGG-hsa00010	0	58	69	0	84.058	-0.578888	1	1
Inositol phosphate metabolism:KEGG-hsa00562	0	59	63	0	93.6508	-0.583913	1	1
Shigellosis:KEGG-hsa05131	0	61	68	0	89.7059	-0.593841	1	1
Pathogenic Escherichia coli infection:KEGG-hsa05130	0	61	67	0	91.0448	-0.593841	1	1
Bile secretion:KEGG-hsa04976	0	62	75	0	82.6667	-0.598746	1	1
Colorectal cancer:KEGG-hsa05210	0	63	77	0	81.8182	-0.603613	1	1
Glioma:KEGG-hsa05214	0	64	83	0	77.1084	-0.608443	1	1
Epithelial cell signaling in Helicobacter pylori infection:KEGG-hsa05120	0	65	83	0	78.3133	-0.613237	1	1
Cardiac muscle contraction:KEGG-hsa04260	0	66	90	0	73.3333	-0.617995	1	1
Arrhythmogenic right ventricular cardiomyopathy (ARVC):KEGG-hsa05412	0	67	88	0	76.1364	-0.622719	1	1
p53 signaling pathway:KEGG-hsa04115	0	68	79	0	86.0759	-0.627409	1	1
Long-term potentiation:KEGG-hsa04720	0	68	76	0	89.4737	-0.627409	1	1
Pathways in cancer:KEGG-hsa05200	1	321	395	0.311526	81.2658	-0.631421	0.466	1
Melanoma:KEGG-hsa05218	0	69	89	0	77.5281	-0.632066	1	1
VEGF signaling pathway:KEGG-hsa04370	0	70	88	0	79.5455	-0.636691	1	1
Gastric acid secretion:KEGG-hsa04971	0	70	82	0	85.3659	-0.636691	1	1
Bacterial invasion of epithelial cells:KEGG-hsa05100	0	70	82	0	85.3659	-0.636691	1	1
Pancreatic cancer:KEGG-hsa05212	0	71	87	0	81.6092	-0.641284	1	1
Fc epsilon RI signaling pathway:KEGG-hsa04664	0	71	97	0	73.1959	-0.641284	1	1
Renal cell carcinoma:KEGG-hsa05211	0	72	85	0	84.7059	-0.645847	1	1
Hypertrophic cardiomyopathy (HCM):KEGG-hsa05410	0	73	112	0	65.1786	-0.650379	1	1
Chronic myeloid leukemia:KEGG-hsa05220	0	74	92	0	80.4348	-0.654881	1	1
B cell receptor signaling pathway:KEGG-hsa04662	0	74	100	0	74	-0.654881	1	1
Adherens junction:KEGG-hsa04520	0	76	88	0	86.3636	-0.663799	1	1
Ribosome biogenesis in eukaryotes:KEGG-hsa03008	0	78	90	0	86.6667	-0.672606	1	1
Phosphatidylinositol signaling system:KEGG-hsa04070	0	78	86	0	90.6977	-0.672606	1	1
Dilated cardiomyopathy:KEGG-hsa05414	0	79	120	0	65.8333	-0.676969	1	1
TGF-beta signaling pathway:KEGG-hsa04350	0	80	94	0	85.1064	-0.681306	1	1
RNA degradation:KEGG-hsa03018	0	80	92	0	86.9565	-0.681306	1	1
Glycerophospholipid metabolism:KEGG-hsa00564	0	83	100	0	83	-0.694163	1	1
Apoptosis:KEGG-hsa04210	0	83	114	0	72.807	-0.694163	1	1
Progesterone-mediated oocyte maturation:KEGG-hsa04914	0	85	94	0	90.4255	-0.702612	1	1
Pancreatic secretion:KEGG-hsa04972	0	85	107	0	79.4393	-0.702612	1	1
mRNA surveillance pathway:KEGG-hsa03015	0	87	92	0	94.5652	-0.710967	1	1
ErbB signaling pathway:KEGG-hsa04012	0	88	102	0	86.2745	-0.71511	0.785	1
Small cell lung cancer:KEGG-hsa05222	0	89	106	0	83.9623	-0.719231	0.767	1
GnRH signaling pathway:KEGG-hsa04912	0	90	107	0	84.1121	-0.72333	0.7655	1
Fc gamma R-mediated phagocytosis:KEGG-hsa04666	0	90	108	0	83.3333	-0.72333	0.7715	1
Gap junction:KEGG-hsa04540	0	92	104	0	88.4615	-0.731464	0.773	1
Chagas disease (American trypanosomiasis):KEGG-hsa05142	0	94	142	0	66.1972	-0.739514	0.771	1
Ribosome:KEGG-hsa03010	0	98	109	0	89.9083	-0.755376	0.7595	1
Pyrimidine metabolism:KEGG-hsa00240	0	98	111	0	88.2883	-0.755376	0.749	1
Olfactory transduction:KEGG-hsa04740	0	98	522	0	18.7739	-0.755376	0.751	1
Vascular smooth muscle contraction:KEGG-hsa04270	0	100	125	0	80	-0.763192	0.7555	1
T cell receptor signaling pathway:KEGG-hsa04660	0	102	138	0	73.913	-0.770935	0.751	1
Osteoclast differentiation:KEGG-hsa04380	0	108	198	0	54.5455	-0.793746	0.7485	1
Oocyte meiosis:KEGG-hsa04114	0	109	115	0	94.7826	-0.79749	0.735	1
Leukocyte transendothelial migration:KEGG-hsa04670	0	112	135	0	82.963	-0.808624	0.7455	1
Glutamatergic synapse:KEGG-hsa04724	0	113	129	0	87.5969	-0.812305	0.7325	1
Natural killer cell mediated cytotoxicity:KEGG-hsa04650	0	118	409	0	28.8509	-0.830484	0.7185	1
Lysosome:KEGG-hsa04142	0	122	146	0	83.5616	-0.84477	0.7255	1
Cell cycle:KEGG-hsa04110	0	125	140	0	89.2857	-0.855342	0.72	1
Hepatitis C:KEGG-hsa05160	0	126	165	0	76.3636	-0.85884	0.689	1
Neurotrophin signaling pathway:KEGG-hsa04722	0	127	144	0	88.1944	-0.862325	0.7015	1
Measles:KEGG-hsa05162	0	128	183	0	69.9454	-0.865797	0.709	1
Tight junction:KEGG-hsa04530	0	129	152	0	84.8684	-0.869257	0.7135	1
Axon guidance:KEGG-hsa04360	0	129	136	0	94.8529	-0.869257	0.705	1
Parkinson's disease:KEGG-hsa05012	0	130	150	0	86.6667	-0.872705	0.7035	1
Ubiquitin mediated proteolysis:KEGG-hsa04120	0	132	151	0	87.4172	-0.879563	0.707	1
Oxidative phosphorylation:KEGG-hsa00190	0	132	159	0	83.0189	-0.879563	0.706	1
Insulin signaling pathway:KEGG-hsa04910	0	137	165	0	83.0303	-0.896502	0.6995	1
Wnt signaling pathway:KEGG-hsa04310	0	144	167	0	86.2275	-0.919746	0.6775	1
Spliceosome:KEGG-hsa03040	0	148	176	0	84.0909	-0.932796	0.679	1
Chemokine signaling pathway:KEGG-hsa04062	0	155	222	0	69.8198	-0.955253	0.669	1
RNA transport:KEGG-hsa03013	0	156	172	0	90.6977	-0.958423	0.6945	1
Purine metabolism:KEGG-hsa00230	0	157	178	0	88.2022	-0.961584	0.6765	1
Protein processing in endoplasmic reticulum:KEGG-hsa04141	0	174	192	0	90.625	-1.01399	0.663	1
Regulation of actin cytoskeleton:KEGG-hsa04810	0	207	234	0	88.4615	-1.10956	0.5215	1
MAPK signaling pathway:KEGG-hsa04010	0	257	323	0	79.5666	-1.24247	0.478	1

## Sheet: 575A
colors:
2017-04-19
Homo sapiens
Pvalues = true
Calculation Summary:
185 Ensembl source identifiers supplied in the input file:041917_575ainduced2input.txt
185 source identifiers meeting the filter linked to a Ensembl ID.
77 genes meeting the criterion linked to a term.
16559 source identifiers in this dataset.
16559 source identifiers linked to a Ensembl ID.
4999 Genes linked to a term.
The z score is based on an N of 4999 and a R of 77 distinct genes in all terms.
Gene-Set Name	Number Changed	Number Measured	Number in Gene-Set	Percent Changed	Percent Present	Z Score	PermuteP	AdjustedP
PPAR signaling pathway:KEGG-hsa03320	9	67	78	13.4328	85.8974	7.95729	0	0.0143125
ECM-receptor interaction:KEGG-hsa04512	9	76	118	11.8421	64.4068	7.34801	0	0.0143125
Malaria:KEGG-hsa05144	5	37	66	13.5135	56.0606	5.93537	0	0.0143125
Protein digestion and absorption:KEGG-hsa04974	6	64	98	9.375	65.3061	5.12193	0	0.0143125
Hematopoietic cell lineage:KEGG-hsa04640	6	64	126	9.375	50.7937	5.12193	0.0005	0.0143125
Fatty acid metabolism:KEGG-hsa00071	4	40	45	10	88.8889	4.36167	0.0005	0.0143125
Adipocytokine signaling pathway:KEGG-hsa04920	5	67	92	7.46269	72.8261	3.96266	0.0005	0.0143125
Focal adhesion:KEGG-hsa04510	9	188	244	4.78723	77.0492	3.68467	0	0.0143125
Steroid hormone biosynthesis:KEGG-hsa00140	3	34	71	8.82353	47.8873	3.45994	0.0085	0.162208
Metabolism of xenobiotics by cytochrome P450:KEGG-hsa00980	3	47	79	6.38298	59.4937	2.70837	0.013	0.212643
Hedgehog signaling pathway:KEGG-hsa04340	3	48	61	6.25	78.6885	2.66215	0.013	0.212643
Basal cell carcinoma:KEGG-hsa05217	3	48	63	6.25	76.1905	2.66215	0.0145	0.221367
Tuberculosis:KEGG-hsa05152	6	143	288	4.1958	49.6528	2.61601	0.0055	0.12595
Phagosome:KEGG-hsa04145	6	152	314	3.94737	48.4076	2.44702	0.005	0.12595
Regulation of actin cytoskeleton:KEGG-hsa04810	7	197	234	3.5533	84.188	2.34061	0.0075	0.156136
Alanine, aspartate and glutamate metabolism:KEGG-hsa00250	2	31	34	6.45161	91.1765	2.22716	0.049	0.525659
Synthesis and degradation of ketone bodies:KEGG-hsa00072	1	10	11	10	90.9091	2.17427	0.11	0.683905
Arrhythmogenic right ventricular cardiomyopathy (ARVC):KEGG-hsa05412	3	62	88	4.83871	70.4545	2.12194	0.0315	0.40075
Prion diseases:KEGG-hsa05020	2	33	55	6.06061	60	2.11537	0.0505	0.525659
Rheumatoid arthritis:KEGG-hsa05323	3	65	191	4.61538	34.0314	2.02618	0.045	0.51525
Hypertrophic cardiomyopathy (HCM):KEGG-hsa05410	3	65	112	4.61538	58.0357	2.02618	0.031	0.40075
Retinol metabolism:KEGG-hsa00830	2	37	69	5.40541	53.6232	1.91601	0.0625	0.593969
Fat digestion and absorption:KEGG-hsa04975	2	37	53	5.40541	69.8113	1.91601	0.073	0.593969
Dilated cardiomyopathy:KEGG-hsa05414	3	69	120	4.34783	57.5	1.90673	0.0395	0.476079
Graft-versus-host disease:KEGG-hsa05332	2	38	284	5.26316	13.3803	1.87046	0.0725	0.593969
Glycosphingolipid biosynthesis - globo series:KEGG-hsa00603	1	13	15	7.69231	86.6667	1.80334	0.1365	0.726942
Type I diabetes mellitus:KEGG-hsa04940	2	42	167	4.7619	25.1497	1.70236	0.083	0.593969
Vasopressin-regulated water reabsorption:KEGG-hsa04962	2	44	48	4.54545	91.6667	1.62568	0.091	0.631485
Terpenoid backbone biosynthesis:KEGG-hsa00900	1	15	18	6.66667	83.3333	1.61447	0.1685	0.799163
MAPK signaling pathway:KEGG-hsa04010	7	258	323	2.71318	79.8762	1.57069	0.0265	0.379281
alpha-Linolenic acid metabolism:KEGG-hsa00592	1	16	21	6.25	76.1905	1.53205	0.1705	0.799163
Glycosphingolipid biosynthesis - ganglio series:KEGG-hsa00604	1	16	19	6.25	84.2105	1.53205	0.159	0.799163
Apoptosis:KEGG-hsa04210	3	85	114	3.52941	74.5614	1.50181	0.0795	0.593969
Melanogenesis:KEGG-hsa04916	3	87	110	3.44828	79.0909	1.45769	0.06	0.593969
Phenylalanine metabolism:KEGG-hsa00360	1	17	19	5.88235	89.4737	1.45607	0.183	0.823951
Glycerolipid metabolism:KEGG-hsa00561	2	49	60	4.08163	81.6667	1.45151	0.098	0.6412
Prostate cancer:KEGG-hsa05215	3	90	105	3.33333	85.7143	1.39372	0.073	0.593969
Amoebiasis:KEGG-hsa05146	3	90	138	3.33333	65.2174	1.39372	0.082	0.593969
Glycosaminoglycan degradation:KEGG-hsa00531	1	18	19	5.55556	94.7368	1.38566	0.1835	0.823951
NOD-like receptor signaling pathway:KEGG-hsa04621	2	52	78	3.84615	66.6667	1.35714	0.12	0.704615
Leishmaniasis:KEGG-hsa05140	2	53	167	3.77358	31.7365	1.32715	0.1105	0.683905
Pentose and glucuronate interconversions:KEGG-hsa00040	1	19	38	5.26316	50	1.32009	0.171	0.799163
Calcium signaling pathway:KEGG-hsa04020	4	139	191	2.8777	72.7749	1.29841	0.066	0.593969
Arginine and proline metabolism:KEGG-hsa00330	2	54	59	3.7037	91.5254	1.29782	0.1195	0.704615
Vascular smooth muscle contraction:KEGG-hsa04270	3	97	125	3.09278	77.6	1.25369	0.0945	0.636485
Long-term depression:KEGG-hsa04730	2	59	79	3.38983	74.6835	1.16035	0.136	0.726942
Gastric acid secretion:KEGG-hsa04971	2	59	82	3.38983	71.9512	1.16035	0.133	0.726942
Pathways in cancer:KEGG-hsa05200	7	310	395	2.25806	78.481	1.05946	0.3585	0.988164
Linoleic acid metabolism:KEGG-hsa00591	1	24	31	4.16667	77.4194	1.0472	0.235	0.921285
Galactose metabolism:KEGG-hsa00052	1	24	32	4.16667	75	1.0472	0.242	0.921285
Osteoclast differentiation:KEGG-hsa04380	3	110	198	2.72727	55.5556	1.02209	0.1265	0.724213
Collecting duct acid secretion:KEGG-hsa04966	1	25	36	4	69.4444	1.00107	0.252	0.921285
African trypanosomiasis:KEGG-hsa05143	1	25	50	4	50	1.00107	0.2585	0.921285
beta-Alanine metabolism:KEGG-hsa00410	1	26	28	3.84615	92.8571	0.957134	0.2605	0.921285
Butanoate metabolism:KEGG-hsa00650	1	26	32	3.84615	81.25	0.957134	0.2615	0.921285
Mucin type O-Glycan biosynthesis:KEGG-hsa00512	1	27	30	3.7037	90	0.915203	0.2565	0.921285
Histidine metabolism:KEGG-hsa00340	1	28	30	3.57143	93.3333	0.8751	0.2745	0.932357
Cell adhesion molecules (CAMs):KEGG-hsa04514	3	120	254	2.5	47.2441	0.864017	0.15	0.780682
Pancreatic secretion:KEGG-hsa04972	2	73	107	2.73973	68.2243	0.838204	0.197	0.851189
Primary immunodeficiency:KEGG-hsa05340	1	29	79	3.44828	36.7089	0.836675	0.2885	0.932357
Axon guidance:KEGG-hsa04360	3	123	136	2.43902	90.4412	0.819424	0.1695	0.799163
Peroxisome:KEGG-hsa04146	2	74	85	2.7027	87.0588	0.817959	0.1885	0.830125
Neuroactive ligand-receptor interaction:KEGG-hsa04080	4	177	291	2.25989	60.8247	0.791437	0.4185	0.988164
Staphylococcus aureus infection:KEGG-hsa05150	1	31	173	3.22581	17.9191	0.764335	0.2895	0.932357
Ether lipid metabolism:KEGG-hsa00565	1	32	38	3.125	84.2105	0.730193	0.2935	0.932357
Drug metabolism - other enzymes:KEGG-hsa00983	1	34	60	2.94118	56.6667	0.665491	0.3135	0.932357
Tyrosine metabolism:KEGG-hsa00350	1	35	42	2.85714	83.3333	0.634767	0.3345	0.976873
Fructose and mannose metabolism:KEGG-hsa00051	1	36	39	2.77778	92.3077	0.605033	0.337	0.976873
Toll-like receptor signaling pathway:KEGG-hsa04620	2	86	131	2.32558	65.6489	0.596433	0.244	0.921285
Pyruvate metabolism:KEGG-hsa00620	1	38	42	2.63158	90.4762	0.548283	0.3575	0.988164
Tryptophan metabolism:KEGG-hsa00380	1	39	43	2.5641	90.6977	0.521158	0.3585	0.988164
Type II diabetes mellitus:KEGG-hsa04930	1	42	63	2.38095	66.6667	0.444214	0.3795	0.988164
Complement and coagulation cascades:KEGG-hsa04610	1	42	119	2.38095	35.2941	0.444214	0.3725	0.988164
Bladder cancer:KEGG-hsa05219	1	42	52	2.38095	80.7692	0.444214	0.391	0.988164
Valine, leucine and isoleucine degradation:KEGG-hsa00280	1	44	50	2.27273	88	0.396214	0.3985	0.988164
Purine metabolism:KEGG-hsa00230	3	156	178	1.92308	87.6404	0.394373	0.5525	1
Amino sugar and nucleotide sugar metabolism:KEGG-hsa00520	1	45	51	2.22222	88.2353	0.373098	0.3995	0.988164
Arachidonic acid metabolism:KEGG-hsa00590	1	46	62	2.17391	74.1935	0.350533	0.407	0.988164
Drug metabolism - cytochrome P450:KEGG-hsa00982	1	47	84	2.12766	55.9524	0.32849	0.403	0.988164
Cytosolic DNA-sensing pathway:KEGG-hsa04623	1	48	69	2.08333	69.5652	0.306944	0.406	0.988164
Amyotrophic lateral sclerosis (ALS):KEGG-hsa05014	1	48	68	2.08333	70.5882	0.306944	0.4185	0.988164
Lysine degradation:KEGG-hsa00310	1	51	56	1.96078	91.0714	0.245062	0.439	0.988164
Cytokine-cytokine receptor interaction:KEGG-hsa04060	3	180	334	1.66667	53.8922	0.140193	0.863	1
Inositol phosphate metabolism:KEGG-hsa00562	1	57	63	1.75439	90.4762	0.131985	0.488	0.988164
Glycolysis / Gluconeogenesis:KEGG-hsa00010	1	57	69	1.75439	82.6087	0.131985	0.4815	0.988164
Acute myeloid leukemia:KEGG-hsa05221	1	57	72	1.75439	79.1667	0.131985	0.483	0.988164
Natural killer cell mediated cytotoxicity:KEGG-hsa04650	2	120	409	1.66667	29.3399	0.113761	0.753	1
Toxoplasmosis:KEGG-hsa05145	2	122	252	1.63934	48.4127	0.0899213	0.7465	1
Salivary secretion:KEGG-hsa04970	1	61	96	1.63934	63.5417	0.06319	0.51	0.988164
Pathogenic Escherichia coli infection:KEGG-hsa05130	1	61	67	1.63934	91.0448	0.06319	0.4805	0.988164
Measles:KEGG-hsa05162	2	125	183	1.6	68.306	0.0548773	0.7495	1
Shigellosis:KEGG-hsa05131	1	62	68	1.6129	91.1765	0.0467022	0.513	0.988164
Colorectal cancer:KEGG-hsa05210	1	64	77	1.5625	83.1169	0.014508	0.5295	0.993898
Melanoma:KEGG-hsa05218	1	65	89	1.53846	73.0337	-0.00121668	0.5135	0.988164
Wnt signaling pathway:KEGG-hsa04310	2	133	167	1.50376	79.6407	-0.0346878	0.7805	1
VEGF signaling pathway:KEGG-hsa04370	1	71	88	1.40845	80.6818	-0.090858	0.5515	1
Bacterial invasion of epithelial cells:KEGG-hsa05100	1	71	82	1.40845	86.5854	-0.090858	0.557	1
Fc epsilon RI signaling pathway:KEGG-hsa04664	1	73	97	1.36986	75.2577	-0.119114	0.56	1
Adherens junction:KEGG-hsa04520	1	75	88	1.33333	85.2273	-0.146641	0.571	1
Chemokine signaling pathway:KEGG-hsa04062	2	145	222	1.37931	65.3153	-0.159742	0.8245	1
TGF-beta signaling pathway:KEGG-hsa04350	1	77	94	1.2987	81.9149	-0.17348	0.558	1
Phosphatidylinositol signaling system:KEGG-hsa04070	1	77	86	1.2987	89.5349	-0.17348	0.5875	1
Biotin metabolism:KEGG-hsa00780	0	2	2	0	100	-0.176902	1	1
Lysine biosynthesis:KEGG-hsa00300	0	3	3	0	100	-0.216682	1	1
Lipoic acid metabolism:KEGG-hsa00785	0	3	3	0	100	-0.216682	1	1
Antigen processing and presentation:KEGG-hsa04612	1	82	441	1.21951	18.5941	-0.237821	0.5845	1
Thiamine metabolism:KEGG-hsa00730	0	4	5	0	80	-0.250227	1	1
Phenylalanine, tyrosine and tryptophan biosynthesis:KEGG-hsa00400	0	4	5	0	80	-0.250227	1	1
D-Glutamine and D-glutamate metabolism:KEGG-hsa00471	0	4	4	0	100	-0.250227	1	1
Butirosin and neomycin biosynthesis:KEGG-hsa00524	0	4	6	0	66.6667	-0.250227	1	1
Biosynthesis of unsaturated fatty acids:KEGG-hsa01040	0	4	6	0	66.6667	-0.250227	1	1
Caffeine metabolism:KEGG-hsa00232	0	5	7	0	71.4286	-0.279791	1	1
Glycerophospholipid metabolism:KEGG-hsa00564	1	87	100	1.14943	87	-0.298636	0.6315	1
Fc gamma R-mediated phagocytosis:KEGG-hsa04666	1	87	108	1.14943	80.5556	-0.298636	0.639	1
Vitamin B6 metabolism:KEGG-hsa00750	0	6	6	0	100	-0.306526	1	1
Glycosaminoglycan biosynthesis - heparan sulfate:KEGG-hsa00534	0	6	8	0	75	-0.306526	1	1
Cyanoamino acid metabolism:KEGG-hsa00460	0	6	7	0	85.7143	-0.306526	1	1
Chagas disease (American trypanosomiasis):KEGG-hsa05142	1	88	142	1.13636	61.9718	-0.310415	0.622	1
Alzheimer's disease:KEGG-hsa05010	2	162	200	1.23457	81	-0.321209	0.841	1
Ubiquinone and other terpenoid-quinone biosynthesis:KEGG-hsa00130	0	7	7	0	100	-0.331119	1	1
Taurine and hypotaurine metabolism:KEGG-hsa00430	0	7	11	0	63.6364	-0.331119	1	1
Fatty acid biosynthesis:KEGG-hsa00061	0	7	7	0	100	-0.331119	1	1
Small cell lung cancer:KEGG-hsa05222	1	90	106	1.11111	84.9057	-0.333616	0.635	1
GnRH signaling pathway:KEGG-hsa04912	1	90	107	1.11111	84.1121	-0.333616	0.624	1
Systemic lupus erythematosus:KEGG-hsa05322	1	93	247	1.07527	37.6518	-0.367564	0.6565	1
Fatty acid elongation in mitochondria:KEGG-hsa00062	0	9	16	0	56.25	-0.375529	1	1
Sulfur relay system:KEGG-hsa04122	0	10	11	0	90.9091	-0.395882	1	1
Pyrimidine metabolism:KEGG-hsa00240	1	96	111	1.04167	86.4865	-0.400551	0.6505	1
Sulfur metabolism:KEGG-hsa00920	0	11	14	0	78.5714	-0.415246	1	1
Riboflavin metabolism:KEGG-hsa00740	0	11	12	0	91.6667	-0.415246	1	1
Folate biosynthesis:KEGG-hsa00790	0	11	13	0	84.6154	-0.415246	1	1
Primary bile acid biosynthesis:KEGG-hsa00120	0	12	17	0	70.5882	-0.433754	1	1
Non-homologous end-joining:KEGG-hsa03450	0	12	18	0	66.6667	-0.433754	1	1
Asthma:KEGG-hsa05310	0	12	109	0	11.0092	-0.433754	1	1
Valine, leucine and isoleucine biosynthesis:KEGG-hsa00290	0	13	18	0	72.2222	-0.451511	1	1
Glycosaminoglycan biosynthesis - chondroitin sulfate:KEGG-hsa00532	0	13	14	0	92.8571	-0.451511	1	1
Ascorbate and aldarate metabolism:KEGG-hsa00053	0	13	32	0	40.625	-0.451511	1	1
Renin-angiotensin system:KEGG-hsa04614	0	14	17	0	82.3529	-0.468602	1	1
Glyoxylate and dicarboxylate metabolism:KEGG-hsa00630	0	16	18	0	88.8889	-0.501057	1	1
Glutamatergic synapse:KEGG-hsa04724	1	106	129	0.943396	82.1705	-0.50436	0.489	0.988164
Selenocompound metabolism:KEGG-hsa00450	0	17	18	0	94.4444	-0.51653	1	1
Pantothenate and CoA biosynthesis:KEGG-hsa00770	0	17	19	0	89.4737	-0.51653	1	1
Leukocyte transendothelial migration:KEGG-hsa04670	1	108	135	0.925926	80	-0.524103	0.4925	0.988164
One carbon pool by folate:KEGG-hsa00670	0	18	23	0	78.2609	-0.531558	1	1
Maturity onset diabetes of the young:KEGG-hsa04950	0	18	29	0	62.069	-0.531558	1	1
Steroid biosynthesis:KEGG-hsa00100	0	19	20	0	95	-0.546179	1	1
Vitamin digestion and absorption:KEGG-hsa04977	0	20	28	0	71.4286	-0.560424	1	1
Proximal tubule bicarbonate reclamation:KEGG-hsa04964	0	20	25	0	80	-0.560424	1	1
Nitrogen metabolism:KEGG-hsa00910	0	20	25	0	80	-0.560424	1	1
Regulation of autophagy:KEGG-hsa04140	0	21	34	0	61.7647	-0.574321	1	1
Dorso-ventral axis formation:KEGG-hsa04320	0	21	34	0	61.7647	-0.574321	1	1
Circadian rhythm - mammal:KEGG-hsa04710	0	21	22	0	95.4545	-0.574321	1	1
Protein export:KEGG-hsa03060	0	23	23	0	100	-0.601169	1	1
Phototransduction:KEGG-hsa04744	0	23	29	0	79.3103	-0.601169	1	1
Glycosylphosphatidylinositol(GPI)-anchor biosynthesis:KEGG-hsa00563	0	23	26	0	88.4615	-0.601169	1	1
Mismatch repair:KEGG-hsa03430	0	24	30	0	80	-0.61416	1	1
Glycosphingolipid biosynthesis - lacto and neolacto series:KEGG-hsa00601	0	24	26	0	92.3077	-0.61416	1	1
Nicotinate and nicotinamide metabolism:KEGG-hsa00760	0	25	27	0	92.5926	-0.626888	1	1
Pentose phosphate pathway:KEGG-hsa00030	0	27	30	0	90	-0.651612	1	1
Lysosome:KEGG-hsa04142	1	122	146	0.819672	83.5616	-0.654311	0.5095	0.988164
Taste transduction:KEGG-hsa04742	0	28	73	0	38.3562	-0.663636	1	1
RNA polymerase:KEGG-hsa03020	0	28	37	0	75.6757	-0.663636	1	1
Porphyrin and chlorophyll metabolism:KEGG-hsa00860	0	28	50	0	56	-0.663636	1	1
Homologous recombination:KEGG-hsa03440	0	29	35	0	82.8571	-0.67545	1	1
Citrate cycle (TCA cycle):KEGG-hsa00020	0	29	34	0	85.2941	-0.67545	1	1
Intestinal immune network for IgA production:KEGG-hsa04672	0	30	126	0	23.8095	-0.687067	1	1
Carbohydrate digestion and absorption:KEGG-hsa04973	0	30	53	0	56.6038	-0.687067	1	1
Neurotrophin signaling pathway:KEGG-hsa04722	1	127	144	0.787402	88.1944	-0.697838	0.5275	0.993898
Starch and sucrose metabolism:KEGG-hsa00500	0	32	64	0	50	-0.709742	1	1
Glycine, serine and threonine metabolism:KEGG-hsa00260	0	32	35	0	91.4286	-0.709742	1	1
Thyroid cancer:KEGG-hsa05216	0	33	42	0	78.5714	-0.720819	0.7265	1
Propanoate metabolism:KEGG-hsa00640	0	33	33	0	100	-0.720819	0.732	1
Base excision repair:KEGG-hsa03410	0	33	36	0	91.6667	-0.720819	0.749	1
Oxidative phosphorylation:KEGG-hsa00190	1	130	159	0.769231	81.761	-0.723294	0.397	0.988164
SNARE interactions in vesicular transport:KEGG-hsa04130	0	35	38	0	92.1053	-0.74249	0.7375	1
Cysteine and methionine metabolism:KEGG-hsa00270	0	35	39	0	89.7436	-0.74249	0.719	1
Aldosterone-regulated sodium reabsorption:KEGG-hsa04960	0	35	47	0	74.4681	-0.74249	0.736	1
DNA replication:KEGG-hsa03030	0	37	42	0	88.0952	-0.763564	0.723	1
Endocrine and other factor-regulated calcium reabsorption:KEGG-hsa04961	0	39	52	0	75	-0.784087	0.7175	1
Allograft rejection:KEGG-hsa05330	0	39	157	0	24.8408	-0.784087	0.733	1
Sphingolipid metabolism:KEGG-hsa00600	0	40	52	0	76.9231	-0.794156	0.718	1
Notch signaling pathway:KEGG-hsa04330	0	42	55	0	76.3636	-0.813932	0.6795	1
Mineral absorption:KEGG-hsa04978	0	42	56	0	75	-0.813932	0.7115	1
Proteasome:KEGG-hsa03050	0	43	62	0	69.3548	-0.823647	0.7035	1
Autoimmune thyroid disease:KEGG-hsa05320	0	43	165	0	26.0606	-0.823647	0.712	1
ABC transporters:KEGG-hsa02010	0	43	62	0	69.3548	-0.823647	0.695	1
Basal transcription factors:KEGG-hsa03022	0	44	58	0	75.8621	-0.833254	0.702	1
Glutathione metabolism:KEGG-hsa00480	0	45	57	0	78.9474	-0.842754	0.711	1
Aminoacyl-tRNA biosynthesis:KEGG-hsa00970	0	45	53	0	84.9057	-0.842754	0.6965	1
Nucleotide excision repair:KEGG-hsa03420	0	46	67	0	68.6567	-0.852153	0.686	1
N-Glycan biosynthesis:KEGG-hsa00510	0	47	50	0	94	-0.861452	0.678	1
Vibrio cholerae infection:KEGG-hsa05110	0	50	67	0	74.6269	-0.88879	0.6825	1
mTOR signaling pathway:KEGG-hsa04150	0	51	62	0	82.2581	-0.897724	0.6785	1
Endometrial cancer:KEGG-hsa05213	0	54	68	0	79.4118	-0.924031	0.6505	1
Bile secretion:KEGG-hsa04976	0	56	75	0	74.6667	-0.941177	0.6695	1
RIG-I-like receptor signaling pathway:KEGG-hsa04622	0	59	87	0	67.8161	-0.966352	0.66	1
Non-small cell lung cancer:KEGG-hsa05223	0	59	75	0	78.6667	-0.966352	0.655	1
Long-term potentiation:KEGG-hsa04720	0	59	76	0	77.6316	-0.966352	0.652	1
Cardiac muscle contraction:KEGG-hsa04260	0	61	90	0	67.7778	-0.982793	0.6505	1
Epithelial cell signaling in Helicobacter pylori infection:KEGG-hsa05120	0	62	83	0	74.6988	-0.990916	0.644	1
Glioma:KEGG-hsa05214	0	65	83	0	78.3133	-1.01492	0.4995	0.988164
Olfactory transduction:KEGG-hsa04740	0	66	522	0	12.6437	-1.0228	0.534	0.994195
p53 signaling pathway:KEGG-hsa04115	0	67	79	0	84.8101	-1.03062	0.5195	0.991379
Viral myocarditis:KEGG-hsa05416	0	68	194	0	35.0515	-1.03839	0.4865	0.988164
Protein processing in endoplasmic reticulum:KEGG-hsa04141	1	173	192	0.578035	90.1042	-1.04591	0.311	0.932357
B cell receptor signaling pathway:KEGG-hsa04662	0	71	100	0	71	-1.06137	0.501	0.988164
Renal cell carcinoma:KEGG-hsa05211	0	72	85	0	84.7059	-1.06893	0.4805	0.988164
Pancreatic cancer:KEGG-hsa05212	0	72	87	0	82.7586	-1.06893	0.4785	0.988164
Huntington's disease:KEGG-hsa05016	1	177	205	0.564972	86.3415	-1.07274	0.3055	0.932357
Ribosome biogenesis in eukaryotes:KEGG-hsa03008	0	76	90	0	84.4444	-1.09866	0.464	0.988164
Chronic myeloid leukemia:KEGG-hsa05220	0	76	92	0	82.6087	-1.09866	0.456	0.988164
RNA degradation:KEGG-hsa03018	0	77	92	0	83.6957	-1.10598	0.4745	0.988164
mRNA surveillance pathway:KEGG-hsa03015	0	82	92	0	89.1304	-1.1419	0.4745	0.988164
Progesterone-mediated oocyte maturation:KEGG-hsa04914	0	83	94	0	88.2979	-1.14896	0.46	0.988164
Gap junction:KEGG-hsa04540	0	85	104	0	81.7308	-1.16296	0.4675	0.988164
ErbB signaling pathway:KEGG-hsa04012	0	87	102	0	85.2941	-1.1768	0.4485	0.988164
Ribosome:KEGG-hsa03010	0	96	109	0	88.0734	-1.23731	0.429	0.988164
T cell receptor signaling pathway:KEGG-hsa04660	0	99	138	0	71.7391	-1.25688	0.3715	0.988164
Oocyte meiosis:KEGG-hsa04114	0	105	115	0	91.3043	-1.2952	0.344	0.9847
Tight junction:KEGG-hsa04530	0	122	152	0	80.2632	-1.39854	0.2895	0.932357
Hepatitis C:KEGG-hsa05160	0	124	165	0	75.1515	-1.41025	0.29	0.932357
Cell cycle:KEGG-hsa04110	0	124	140	0	88.5714	-1.41025	0.307	0.932357
Jak-STAT signaling pathway:KEGG-hsa04630	0	127	184	0	69.0217	-1.42765	0.3005	0.932357
Parkinson's disease:KEGG-hsa05012	0	128	150	0	85.3333	-1.4334	0.291	0.932357
Ubiquitin mediated proteolysis:KEGG-hsa04120	0	133	151	0	88.0795	-1.46188	0.2375	0.921285
Insulin signaling pathway:KEGG-hsa04910	0	134	165	0	81.2121	-1.46752	0.247	0.921285
Spliceosome:KEGG-hsa03040	0	148	176	0	84.0909	-1.5445	0.2185	0.909755
RNA transport:KEGG-hsa03013	0	149	172	0	86.6279	-1.54987	0.21	0.890556
Endocytosis:KEGG-hsa04144	0	222	270	0	82.2222	-1.90621	0.079	0.593969

## Sheet: JMSU-1_575_A intersection
Pvalues = true
Calculation Summary:
18 Ensembl source identifiers supplied in the input file:1212venndiagram2input.txt
18 source identifiers meeting the filter linked to a Ensembl ID.
9 genes meeting the criterion linked to a term.
16559 source identifiers in this dataset.
16559 source identifiers linked to a Ensembl ID.
4999 Genes linked to a term.
The z score is based on an N of 4999 and a R of 9 distinct genes in all terms.
Gene-Set Name	Number Changed	Number Measured	Number in Gene-Set	Percent Changed	Percent Present	Z Score	PermuteP	AdjustedP
PPAR signaling pathway:KEGG-hsa03320	6	67	78	8.95522	85.8974	17.0566	0	0.0381667
Adipocytokine signaling pathway:KEGG-hsa04920	3	67	92	4.47761	72.8261	8.35332	0	0.0381667
Synthesis and degradation of ketone bodies:KEGG-hsa00072	1	10	11	10	90.9091	7.33184	0.0115	0.5267
Fatty acid metabolism:KEGG-hsa00071	2	40	45	5	88.8889	7.21916	0.0005	0.0381667
Vasopressin-regulated water reabsorption:KEGG-hsa04962	2	44	48	4.54545	91.6667	6.86025	0.001	0.05725
Terpenoid backbone biosynthesis:KEGG-hsa00900	1	15	18	6.66667	83.3333	5.93452	0.0145	0.553417
Butanoate metabolism:KEGG-hsa00650	1	26	32	3.84615	81.25	4.42073	0.027	0.815813
Alanine, aspartate and glutamate metabolism:KEGG-hsa00250	1	31	34	3.22581	91.1765	4.01233	0.0285	0.815813
Malaria:KEGG-hsa05144	1	37	66	2.7027	56.0606	3.63281	0.0465	0.916
Fat digestion and absorption:KEGG-hsa04975	1	37	53	2.7027	69.8113	3.63281	0.0395	0.916
Valine, leucine and isoleucine degradation:KEGG-hsa00280	1	44	50	2.27273	88	3.28866	0.0455	0.916
Amino sugar and nucleotide sugar metabolism:KEGG-hsa00520	1	45	51	2.22222	88.2353	3.24589	0.048	0.916
Hematopoietic cell lineage:KEGG-hsa04640	1	64	126	1.5625	50.7937	2.62549	0.0655	1
Peroxisome:KEGG-hsa04146	1	74	85	1.35135	87.0588	2.3944	0.0735	1
ECM-receptor interaction:KEGG-hsa04512	1	76	118	1.31579	64.4068	2.35335	0.083	1
Melanogenesis:KEGG-hsa04916	1	87	110	1.14943	79.0909	2.15149	0.0985	1
Prostate cancer:KEGG-hsa05215	1	90	105	1.11111	85.7143	2.10242	0.098	1
Phagosome:KEGG-hsa04145	1	152	314	0.657895	48.4076	1.41122	0.152	1
Huntington's disease:KEGG-hsa05016	1	177	205	0.564972	86.3415	1.2299	0.17	1
Biotin metabolism:KEGG-hsa00780	0	2	2	0	100	-0.0600661	1	1
Lysine biosynthesis:KEGG-hsa00300	0	3	3	0	100	-0.073573	1	1
Lipoic acid metabolism:KEGG-hsa00785	0	3	3	0	100	-0.073573	1	1
Thiamine metabolism:KEGG-hsa00730	0	4	5	0	80	-0.0849633	1	1
Phenylalanine, tyrosine and tryptophan biosynthesis:KEGG-hsa00400	0	4	5	0	80	-0.0849633	1	1
D-Glutamine and D-glutamate metabolism:KEGG-hsa00471	0	4	4	0	100	-0.0849633	1	1
Butirosin and neomycin biosynthesis:KEGG-hsa00524	0	4	6	0	66.6667	-0.0849633	1	1
Biosynthesis of unsaturated fatty acids:KEGG-hsa01040	0	4	6	0	66.6667	-0.0849633	1	1
Caffeine metabolism:KEGG-hsa00232	0	5	7	0	71.4286	-0.0950014	1	1
Vitamin B6 metabolism:KEGG-hsa00750	0	6	6	0	100	-0.104079	1	1
Glycosaminoglycan biosynthesis - heparan sulfate:KEGG-hsa00534	0	6	8	0	75	-0.104079	1	1
Cyanoamino acid metabolism:KEGG-hsa00460	0	6	7	0	85.7143	-0.104079	1	1
Ubiquinone and other terpenoid-quinone biosynthesis:KEGG-hsa00130	0	7	7	0	100	-0.11243	1	1
Taurine and hypotaurine metabolism:KEGG-hsa00430	0	7	11	0	63.6364	-0.11243	1	1
Fatty acid biosynthesis:KEGG-hsa00061	0	7	7	0	100	-0.11243	1	1
Fatty acid elongation in mitochondria:KEGG-hsa00062	0	9	16	0	56.25	-0.127509	1	1
Sulfur relay system:KEGG-hsa04122	0	10	11	0	90.9091	-0.13442	1	1
Sulfur metabolism:KEGG-hsa00920	0	11	14	0	78.5714	-0.140995	1	1
Riboflavin metabolism:KEGG-hsa00740	0	11	12	0	91.6667	-0.140995	1	1
Folate biosynthesis:KEGG-hsa00790	0	11	13	0	84.6154	-0.140995	1	1
Primary bile acid biosynthesis:KEGG-hsa00120	0	12	17	0	70.5882	-0.147279	1	1
Non-homologous end-joining:KEGG-hsa03450	0	12	18	0	66.6667	-0.147279	1	1
Asthma:KEGG-hsa05310	0	12	109	0	11.0092	-0.147279	1	1
Valine, leucine and isoleucine biosynthesis:KEGG-hsa00290	0	13	18	0	72.2222	-0.153308	1	1
Glycosphingolipid biosynthesis - globo series:KEGG-hsa00603	0	13	15	0	86.6667	-0.153308	1	1
Glycosaminoglycan biosynthesis - chondroitin sulfate:KEGG-hsa00532	0	13	14	0	92.8571	-0.153308	1	1
Ascorbate and aldarate metabolism:KEGG-hsa00053	0	13	32	0	40.625	-0.153308	1	1
Renin-angiotensin system:KEGG-hsa04614	0	14	17	0	82.3529	-0.159111	1	1
alpha-Linolenic acid metabolism:KEGG-hsa00592	0	16	21	0	76.1905	-0.170131	1	1
Glyoxylate and dicarboxylate metabolism:KEGG-hsa00630	0	16	18	0	88.8889	-0.170131	1	1
Glycosphingolipid biosynthesis - ganglio series:KEGG-hsa00604	0	16	19	0	84.2105	-0.170131	1	1
Selenocompound metabolism:KEGG-hsa00450	0	17	18	0	94.4444	-0.175385	1	1
Phenylalanine metabolism:KEGG-hsa00360	0	17	19	0	89.4737	-0.175385	1	1
Pantothenate and CoA biosynthesis:KEGG-hsa00770	0	17	19	0	89.4737	-0.175385	1	1
One carbon pool by folate:KEGG-hsa00670	0	18	23	0	78.2609	-0.180487	1	1
Maturity onset diabetes of the young:KEGG-hsa04950	0	18	29	0	62.069	-0.180487	1	1
Glycosaminoglycan degradation:KEGG-hsa00531	0	18	19	0	94.7368	-0.180487	1	1
Steroid biosynthesis:KEGG-hsa00100	0	19	20	0	95	-0.185452	1	1
Pentose and glucuronate interconversions:KEGG-hsa00040	0	19	38	0	50	-0.185452	1	1
Vitamin digestion and absorption:KEGG-hsa04977	0	20	28	0	71.4286	-0.190289	1	1
Proximal tubule bicarbonate reclamation:KEGG-hsa04964	0	20	25	0	80	-0.190289	1	1
Nitrogen metabolism:KEGG-hsa00910	0	20	25	0	80	-0.190289	1	1
Regulation of autophagy:KEGG-hsa04140	0	21	34	0	61.7647	-0.195007	1	1
Dorso-ventral axis formation:KEGG-hsa04320	0	21	34	0	61.7647	-0.195007	1	1
Circadian rhythm - mammal:KEGG-hsa04710	0	21	22	0	95.4545	-0.195007	1	1
Protein export:KEGG-hsa03060	0	23	23	0	100	-0.204123	1	1
Phototransduction:KEGG-hsa04744	0	23	29	0	79.3103	-0.204123	1	1
Glycosylphosphatidylinositol(GPI)-anchor biosynthesis:KEGG-hsa00563	0	23	26	0	88.4615	-0.204123	1	1
Mismatch repair:KEGG-hsa03430	0	24	30	0	80	-0.208535	1	1
Linoleic acid metabolism:KEGG-hsa00591	0	24	31	0	77.4194	-0.208535	1	1
Glycosphingolipid biosynthesis - lacto and neolacto series:KEGG-hsa00601	0	24	26	0	92.3077	-0.208535	1	1
Galactose metabolism:KEGG-hsa00052	0	24	32	0	75	-0.208535	1	1
Nicotinate and nicotinamide metabolism:KEGG-hsa00760	0	25	27	0	92.5926	-0.212856	1	1
Collecting duct acid secretion:KEGG-hsa04966	0	25	36	0	69.4444	-0.212856	1	1
African trypanosomiasis:KEGG-hsa05143	0	25	50	0	50	-0.212856	1	1
beta-Alanine metabolism:KEGG-hsa00410	0	26	28	0	92.8571	-0.217093	1	1
Pentose phosphate pathway:KEGG-hsa00030	0	27	30	0	90	-0.221251	1	1
Mucin type O-Glycan biosynthesis:KEGG-hsa00512	0	27	30	0	90	-0.221251	1	1
Taste transduction:KEGG-hsa04742	0	28	73	0	38.3562	-0.225334	1	1
RNA polymerase:KEGG-hsa03020	0	28	37	0	75.6757	-0.225334	1	1
Porphyrin and chlorophyll metabolism:KEGG-hsa00860	0	28	50	0	56	-0.225334	1	1
Histidine metabolism:KEGG-hsa00340	0	28	30	0	93.3333	-0.225334	1	1
Primary immunodeficiency:KEGG-hsa05340	0	29	79	0	36.7089	-0.229345	1	1
Homologous recombination:KEGG-hsa03440	0	29	35	0	82.8571	-0.229345	1	1
Citrate cycle (TCA cycle):KEGG-hsa00020	0	29	34	0	85.2941	-0.229345	1	1
Intestinal immune network for IgA production:KEGG-hsa04672	0	30	126	0	23.8095	-0.23329	1	1
Carbohydrate digestion and absorption:KEGG-hsa04973	0	30	53	0	56.6038	-0.23329	1	1
Staphylococcus aureus infection:KEGG-hsa05150	0	31	173	0	17.9191	-0.23717	1	1
Starch and sucrose metabolism:KEGG-hsa00500	0	32	64	0	50	-0.240989	1	1
Glycine, serine and threonine metabolism:KEGG-hsa00260	0	32	35	0	91.4286	-0.240989	1	1
Ether lipid metabolism:KEGG-hsa00565	0	32	38	0	84.2105	-0.240989	1	1
Thyroid cancer:KEGG-hsa05216	0	33	42	0	78.5714	-0.24475	1	1
Propanoate metabolism:KEGG-hsa00640	0	33	33	0	100	-0.24475	1	1
Prion diseases:KEGG-hsa05020	0	33	55	0	60	-0.24475	1	1
Base excision repair:KEGG-hsa03410	0	33	36	0	91.6667	-0.24475	1	1
Steroid hormone biosynthesis:KEGG-hsa00140	0	34	71	0	47.8873	-0.248456	1	1
Drug metabolism - other enzymes:KEGG-hsa00983	0	34	60	0	56.6667	-0.248456	1	1
Tyrosine metabolism:KEGG-hsa00350	0	35	42	0	83.3333	-0.252108	1	1
SNARE interactions in vesicular transport:KEGG-hsa04130	0	35	38	0	92.1053	-0.252108	1	1
Cysteine and methionine metabolism:KEGG-hsa00270	0	35	39	0	89.7436	-0.252108	1	1
Aldosterone-regulated sodium reabsorption:KEGG-hsa04960	0	35	47	0	74.4681	-0.252108	1	1
Fructose and mannose metabolism:KEGG-hsa00051	0	36	39	0	92.3077	-0.25571	1	1
Retinol metabolism:KEGG-hsa00830	0	37	69	0	53.6232	-0.259264	1	1
DNA replication:KEGG-hsa03030	0	37	42	0	88.0952	-0.259264	1	1
Pyruvate metabolism:KEGG-hsa00620	0	38	42	0	90.4762	-0.26277	1	1
Graft-versus-host disease:KEGG-hsa05332	0	38	284	0	13.3803	-0.26277	1	1
Tryptophan metabolism:KEGG-hsa00380	0	39	43	0	90.6977	-0.266232	1	1
Endocrine and other factor-regulated calcium reabsorption:KEGG-hsa04961	0	39	52	0	75	-0.266232	1	1
Allograft rejection:KEGG-hsa05330	0	39	157	0	24.8408	-0.266232	1	1
Sphingolipid metabolism:KEGG-hsa00600	0	40	52	0	76.9231	-0.269651	1	1
Type II diabetes mellitus:KEGG-hsa04930	0	42	63	0	66.6667	-0.276366	1	1
Type I diabetes mellitus:KEGG-hsa04940	0	42	167	0	25.1497	-0.276366	1	1
Notch signaling pathway:KEGG-hsa04330	0	42	55	0	76.3636	-0.276366	1	1
Mineral absorption:KEGG-hsa04978	0	42	56	0	75	-0.276366	1	1
Complement and coagulation cascades:KEGG-hsa04610	0	42	119	0	35.2941	-0.276366	1	1
Bladder cancer:KEGG-hsa05219	0	42	52	0	80.7692	-0.276366	1	1
Proteasome:KEGG-hsa03050	0	43	62	0	69.3548	-0.279665	1	1
Autoimmune thyroid disease:KEGG-hsa05320	0	43	165	0	26.0606	-0.279665	1	1
ABC transporters:KEGG-hsa02010	0	43	62	0	69.3548	-0.279665	1	1
Basal transcription factors:KEGG-hsa03022	0	44	58	0	75.8621	-0.282926	1	1
Glutathione metabolism:KEGG-hsa00480	0	45	57	0	78.9474	-0.286152	1	1
Aminoacyl-tRNA biosynthesis:KEGG-hsa00970	0	45	53	0	84.9057	-0.286152	1	1
Nucleotide excision repair:KEGG-hsa03420	0	46	67	0	68.6567	-0.289344	1	1
Arachidonic acid metabolism:KEGG-hsa00590	0	46	62	0	74.1935	-0.289344	1	1
N-Glycan biosynthesis:KEGG-hsa00510	0	47	50	0	94	-0.292501	1	1
Metabolism of xenobiotics by cytochrome P450:KEGG-hsa00980	0	47	79	0	59.4937	-0.292501	1	1
Drug metabolism - cytochrome P450:KEGG-hsa00982	0	47	84	0	55.9524	-0.292501	1	1
Hedgehog signaling pathway:KEGG-hsa04340	0	48	61	0	78.6885	-0.295626	1	1
Cytosolic DNA-sensing pathway:KEGG-hsa04623	0	48	69	0	69.5652	-0.295626	1	1
Basal cell carcinoma:KEGG-hsa05217	0	48	63	0	76.1905	-0.295626	1	1
Amyotrophic lateral sclerosis (ALS):KEGG-hsa05014	0	48	68	0	70.5882	-0.295626	1	1
Glycerolipid metabolism:KEGG-hsa00561	0	49	60	0	81.6667	-0.29872	1	1
Vibrio cholerae infection:KEGG-hsa05110	0	50	67	0	74.6269	-0.301783	1	1
mTOR signaling pathway:KEGG-hsa04150	0	51	62	0	82.2581	-0.304817	1	1
Lysine degradation:KEGG-hsa00310	0	51	56	0	91.0714	-0.304817	1	1
NOD-like receptor signaling pathway:KEGG-hsa04621	0	52	78	0	66.6667	-0.307822	1	1
Leishmaniasis:KEGG-hsa05140	0	53	167	0	31.7365	-0.310799	1	1
Endometrial cancer:KEGG-hsa05213	0	54	68	0	79.4118	-0.313749	1	1
Arginine and proline metabolism:KEGG-hsa00330	0	54	59	0	91.5254	-0.313749	1	1
Bile secretion:KEGG-hsa04976	0	56	75	0	74.6667	-0.319571	1	1
Inositol phosphate metabolism:KEGG-hsa00562	0	57	63	0	90.4762	-0.322445	1	1
Glycolysis / Gluconeogenesis:KEGG-hsa00010	0	57	69	0	82.6087	-0.322445	1	1
Acute myeloid leukemia:KEGG-hsa05221	0	57	72	0	79.1667	-0.322445	1	1
RIG-I-like receptor signaling pathway:KEGG-hsa04622	0	59	87	0	67.8161	-0.328119	1	1
Non-small cell lung cancer:KEGG-hsa05223	0	59	75	0	78.6667	-0.328119	1	1
Long-term potentiation:KEGG-hsa04720	0	59	76	0	77.6316	-0.328119	1	1
Long-term depression:KEGG-hsa04730	0	59	79	0	74.6835	-0.328119	1	1
Gastric acid secretion:KEGG-hsa04971	0	59	82	0	71.9512	-0.328119	1	1
Salivary secretion:KEGG-hsa04970	0	61	96	0	63.5417	-0.333702	1	1
Pathogenic Escherichia coli infection:KEGG-hsa05130	0	61	67	0	91.0448	-0.333702	1	1
Cardiac muscle contraction:KEGG-hsa04260	0	61	90	0	67.7778	-0.333702	1	1
Shigellosis:KEGG-hsa05131	0	62	68	0	91.1765	-0.33646	1	1
Epithelial cell signaling in Helicobacter pylori infection:KEGG-hsa05120	0	62	83	0	74.6988	-0.33646	1	1
Arrhythmogenic right ventricular cardiomyopathy (ARVC):KEGG-hsa05412	0	62	88	0	70.4545	-0.33646	1	1
Protein digestion and absorption:KEGG-hsa04974	0	64	98	0	65.3061	-0.341913	1	1
Colorectal cancer:KEGG-hsa05210	0	64	77	0	83.1169	-0.341913	1	1
Rheumatoid arthritis:KEGG-hsa05323	0	65	191	0	34.0314	-0.344609	1	1
Melanoma:KEGG-hsa05218	0	65	89	0	73.0337	-0.344609	1	1
Hypertrophic cardiomyopathy (HCM):KEGG-hsa05410	0	65	112	0	58.0357	-0.344609	1	1
Glioma:KEGG-hsa05214	0	65	83	0	78.3133	-0.344609	1	1
Olfactory transduction:KEGG-hsa04740	0	66	522	0	12.6437	-0.347285	1	1
p53 signaling pathway:KEGG-hsa04115	0	67	79	0	84.8101	-0.349941	1	1
Viral myocarditis:KEGG-hsa05416	0	68	194	0	35.0515	-0.352579	1	1
Dilated cardiomyopathy:KEGG-hsa05414	0	69	120	0	57.5	-0.355198	1	1
VEGF signaling pathway:KEGG-hsa04370	0	71	88	0	80.6818	-0.360382	1	1
Bacterial invasion of epithelial cells:KEGG-hsa05100	0	71	82	0	86.5854	-0.360382	1	1
B cell receptor signaling pathway:KEGG-hsa04662	0	71	100	0	71	-0.360382	1	1
Renal cell carcinoma:KEGG-hsa05211	0	72	85	0	84.7059	-0.362948	1	1
Pancreatic cancer:KEGG-hsa05212	0	72	87	0	82.7586	-0.362948	1	1
Pancreatic secretion:KEGG-hsa04972	0	73	107	0	68.2243	-0.365497	1	1
Fc epsilon RI signaling pathway:KEGG-hsa04664	0	73	97	0	75.2577	-0.365497	1	1
Adherens junction:KEGG-hsa04520	0	75	88	0	85.2273	-0.370545	1	1
Ribosome biogenesis in eukaryotes:KEGG-hsa03008	0	76	90	0	84.4444	-0.373045	1	1
Chronic myeloid leukemia:KEGG-hsa05220	0	76	92	0	82.6087	-0.373045	1	1
TGF-beta signaling pathway:KEGG-hsa04350	0	77	94	0	81.9149	-0.375529	1	1
RNA degradation:KEGG-hsa03018	0	77	92	0	83.6957	-0.375529	1	1
Phosphatidylinositol signaling system:KEGG-hsa04070	0	77	86	0	89.5349	-0.375529	1	1
mRNA surveillance pathway:KEGG-hsa03015	0	82	92	0	89.1304	-0.387727	1	1
Antigen processing and presentation:KEGG-hsa04612	0	82	441	0	18.5941	-0.387727	1	1
Progesterone-mediated oocyte maturation:KEGG-hsa04914	0	83	94	0	88.2979	-0.390124	1	1
Gap junction:KEGG-hsa04540	0	85	104	0	81.7308	-0.394876	1	1
Apoptosis:KEGG-hsa04210	0	85	114	0	74.5614	-0.394876	1	1
Toll-like receptor signaling pathway:KEGG-hsa04620	0	86	131	0	65.6489	-0.397233	1	1
Glycerophospholipid metabolism:KEGG-hsa00564	0	87	100	0	87	-0.399576	1	1
Fc gamma R-mediated phagocytosis:KEGG-hsa04666	0	87	108	0	80.5556	-0.399576	1	1
ErbB signaling pathway:KEGG-hsa04012	0	87	102	0	85.2941	-0.399576	1	1
Chagas disease (American trypanosomiasis):KEGG-hsa05142	0	88	142	0	61.9718	-0.401907	1	1
Small cell lung cancer:KEGG-hsa05222	0	90	106	0	84.9057	-0.406531	1	1
GnRH signaling pathway:KEGG-hsa04912	0	90	107	0	84.1121	-0.406531	1	1
Amoebiasis:KEGG-hsa05146	0	90	138	0	65.2174	-0.406531	1	1
Systemic lupus erythematosus:KEGG-hsa05322	0	93	247	0	37.6518	-0.413377	1	1
Ribosome:KEGG-hsa03010	0	96	109	0	88.0734	-0.42012	1	1
Pyrimidine metabolism:KEGG-hsa00240	0	96	111	0	86.4865	-0.42012	1	1
Vascular smooth muscle contraction:KEGG-hsa04270	0	97	125	0	77.6	-0.422346	1	1
T cell receptor signaling pathway:KEGG-hsa04660	0	99	138	0	71.7391	-0.426765	1	1
Oocyte meiosis:KEGG-hsa04114	0	105	115	0	91.3043	-0.439776	1	1
Glutamatergic synapse:KEGG-hsa04724	0	106	129	0	82.1705	-0.441911	1	1
Leukocyte transendothelial migration:KEGG-hsa04670	0	108	135	0	80	-0.446151	1	1
Osteoclast differentiation:KEGG-hsa04380	0	110	198	0	55.5556	-0.450355	1	1
Natural killer cell mediated cytotoxicity:KEGG-hsa04650	0	120	409	0	29.3399	-0.470863	1	1
Cell adhesion molecules (CAMs):KEGG-hsa04514	0	120	254	0	47.2441	-0.470863	1	1
Toxoplasmosis:KEGG-hsa05145	0	122	252	0	48.4127	-0.474868	1	1
Tight junction:KEGG-hsa04530	0	122	152	0	80.2632	-0.474868	1	1
Lysosome:KEGG-hsa04142	0	122	146	0	83.5616	-0.474868	1	1
Axon guidance:KEGG-hsa04360	0	123	136	0	90.4412	-0.476859	1	1
Hepatitis C:KEGG-hsa05160	0	124	165	0	75.1515	-0.478842	1	1
Cell cycle:KEGG-hsa04110	0	124	140	0	88.5714	-0.478842	1	1
Measles:KEGG-hsa05162	0	125	183	0	68.306	-0.480819	1	1
Neurotrophin signaling pathway:KEGG-hsa04722	0	127	144	0	88.1944	-0.484749	1	1
Jak-STAT signaling pathway:KEGG-hsa04630	0	127	184	0	69.0217	-0.484749	1	1
Parkinson's disease:KEGG-hsa05012	0	128	150	0	85.3333	-0.486704	1	1
Oxidative phosphorylation:KEGG-hsa00190	0	130	159	0	81.761	-0.490592	1	1
Wnt signaling pathway:KEGG-hsa04310	0	133	167	0	79.6407	-0.496374	1	1
Ubiquitin mediated proteolysis:KEGG-hsa04120	0	133	151	0	88.0795	-0.496374	1	1
Insulin signaling pathway:KEGG-hsa04910	0	134	165	0	81.2121	-0.498288	1	1
Calcium signaling pathway:KEGG-hsa04020	0	139	191	0	72.7749	-0.50776	1	1
Tuberculosis:KEGG-hsa05152	0	143	288	0	49.6528	-0.515226	1	1
Chemokine signaling pathway:KEGG-hsa04062	0	145	222	0	65.3153	-0.518923	1	1
Spliceosome:KEGG-hsa03040	0	148	176	0	84.0909	-0.524426	1	1
RNA transport:KEGG-hsa03013	0	149	172	0	86.6279	-0.526249	1	1
Purine metabolism:KEGG-hsa00230	0	156	178	0	87.6404	-0.538858	1	1
Alzheimer's disease:KEGG-hsa05010	0	162	200	0	81	-0.549463	1	1
Protein processing in endoplasmic reticulum:KEGG-hsa04141	0	173	192	0	90.1042	-0.568458	1	1
Neuroactive ligand-receptor interaction:KEGG-hsa04080	0	177	291	0	60.8247	-0.575231	1	1
Cytokine-cytokine receptor interaction:KEGG-hsa04060	0	180	334	0	53.8922	-0.580266	1	1
Focal adhesion:KEGG-hsa04510	0	188	244	0	77.0492	-0.593513	1	1
Regulation of actin cytoskeleton:KEGG-hsa04810	0	197	234	0	84.188	-0.608123	1	1
Endocytosis:KEGG-hsa04144	0	222	270	0	82.2222	-0.647244	1	1
MAPK signaling pathway:KEGG-hsa04010	0	258	323	0	79.8762	-0.700397	1	1
Pathways in cancer:KEGG-hsa05200	0	310	395	0	78.481	-0.771987	0.7415	1
