# Supplementary material for: Bladder-cancer-associated mutations in RXRA activate peroxisome proliferator-activated receptors to drive urothelial proliferation
Source: eLife journal article supplement (doi:10.7554/elife.30862), 2017-11-16
Supplement: supp [file elife_poa_e30862_Figure_1_source_data_2.xlsx]

## Sheet: RAE_intersect
Supplemental Table 2
Group	Total peaks	Peaks with increased H3k27ac in mutant (FDR<.05)
RAE WT	2525	105
RAE MT	2142	306
RAE MT+WT	4209	672
