# Supplementary material for: Bladder-cancer-associated mutations in RXRA activate peroxisome proliferator-activated receptors to drive urothelial proliferation
Source: eLife journal article supplement (doi:10.7554/elife.30862), 2017-11-16
Supplement: supp [file elife_poa_e30862_Supplemental_File_1_Key_resources_table.xlsx]

## Sheet: Non-primer reagents
Reagent type. Duplicate rows as needed. Order is flexible, but row titles must be preserved. Species (mandatory if applicable). Append in parentheses. First mention, use full genus. Sex (if applicable). Add within parentheses after species.	Designation. Symbol/name used in publication. Separate multiple entries with semi-colon, space. (If semi-colon within designation, delimit wtith double quotes.)	Source (public). Stock center, company, data repository. Reference. Include PMID or DOI; use “this paper” if new. If neither applies enter “other” and explain in Additional Information.	Identifiers. Format as ID_source:identifier. Separate multiple entries with semi-colon, space. Include catalog numbers, stock numbers, database IDs or accession numbers, RRIDs.	Additional information. Mandatory if column C entry is “this paper” or “other”. Description of new reagent; laboratory from which reagent obtained; other pertinent information. For antibodies, indicate dilution and conditions used.
Key Resources Table
Reagent type (species) or resource	Designation	Source or reference	Identifiers	Additional information
gene (Homo sapiens)	RXRA	NA	NCBI Gene ID:6256; NM_002957
gene (H. sapiens)	PPARG	NA	NCBI Gene ID:5468; NM_138711
gene (H. sapiens)	PPARD	NA	NCBI Gene ID:5467; NM_006238
strain, strain background (Mus musculus)	Kdm6aF	other		Generated by Dr. Lukas Wartman (Washington University School of Medicine) with ES cells obtained from EUCOMM with the Kdm6atm1a(EUCOMM)Wtsi allele (manuscript in preparation)
strain, strain background (M. musculus)	Trp53Flox; B6.129P2-Trp53tm1brn/J	The Jackson Laboratory	The Jackson Laboratory:008462; RRID:IMSR_JAX:008462
genetic reagent	Ad5CMVCre-eGFP adenovirus	University of Iowa Viral Vector Core	VVC-U of Iowa:1174
cell line (M. musculus)	MCB6C	this paper		Clonal organoid line generated from tumor bearing bladder of male C57BL/6 mouse treated with BBN
cell line (M. musculus)	DKO 431.A	this paper		clonal organoid line generated from the urothelium of a male Trp53Flox/Flox;Kdm6aFlox mouse
cell line (M. musculus)	WT	this paper		Organoid lines generated from the urothelium of wild-type male mice resulting from cross between Trp53Flox/+ and Kdm6aFlox/+ mice
cell line (M. musculus)	"Trp53-/-;Kdm6a-"; DKO	this paper		Organoid lines were generated from the urothelium of Trp53Flox/Flox;Kdm6aFlox male mice and then infected with Ad5CMVCre-eGFP adenovirus in vitro
cell line (M. musculus)	"Kdm6a-"; KKO	this paper		Organoid lines were generated from the urothelium of Kdm6aFlox male mice and then infected with Ad5CMVCre-eGFP adenovirus in vitro
cell line (M. musculus)	"Trp53-/-"; PKO	this paper		Organoid lines were generated from the urothelium of Trp53Flox/Flox male mice and then infected with Ad5CMVCre-eGFP adenovirus in vitro
cell line (M. musculus)	DKO 431.A.EV	this paper		DKO 431.A organoid line infected with retrovirus carrying pBABE puro empty vector
cell line (M. musculus)	DKO 431.A.RXRAwt	this paper		DKO 431.A organoid line infected with retrovirus carrying pBABE puro RXRA
cell line (M. musculus)	DKO 431.A.RXRAS427F	this paper		DKO 431.A organoid line infected with retrovirus carrying pBABE puro RXRA S427F
cell line (H. sapiens)	JMSU-1	other	RRID:CVCL_2081	obtained from Dr. David Solit (MSKCC)
cell line (H. sapiens)	575A	other	RRID:CVCL_7941	obtained from Dr. David Solit (MSKCC)
cell line (H. sapiens)	UM-UC-3	other	RRID:CVCL_1783	obtained from Dr. David Solit (MSKCC)
cell line (H. sapiens)	Lenti-X 293T	Clontech	Clontech:632180
cell line (H. sapiens)	JMSU-1 RXRA WT	this paper		JMSU-1 cell line infected with retrovirus carrying pBABE puro RXRA
cell line (H. sapiens)	JMSU-1 RXRA S427F	this paper		JMSU-1 cell line infected with retrovirus carrying pBABE puro RXRA S427F
cell line (H. sapiens)	JMSU-1 RXRA S427Y	this paper		JMSU-1 cell line infected with retrovirus carrying pBABE puro RXRA S427Y
cell line (H. sapiens)	575A RXRA WT	this paper		575A cell line infected with retrovirus carrying pBABE puro RXRA
cell line (H. sapiens)	575A RXRA S427F	this paper		575A cell line infected with retrovirus carrying pBABE puro RXRA S427F
antibody	anti-PPARG (81B8) (rabbit monoclonal)	Cell Signaling Technology	Cell Signaling Technology:2443; RRID:AB_823598	(1:1000)
antibody	anti-PPARD (rabbit monoclonal)	Abcam	Abcam:ab178866	(1:5000)
antibody	anti-RXRA (D6H10) (rabbit monoclonal)	Cell Signaling Technology	Cell Signaling Technology:3085	(1:1200)
antibody	anti-beta-Actin (mouse monoclonal)	Sigma-Aldrich	Sigma-Aldrich:A5441; RRID:AB_476744	(1:50000)
antibody	anti-GAPDH (D16H11) (rabbit monoclonal)	Cell Signaling Technology	Cell Signaling Technology:5174; RRID:AB_10622025	(1:1000)
antibody	anti-rabbit IgG, HRP (goat)	Cell Signaling Technology	Cell Signaling Technology:7074; RRID:AB_2099233	(1:7500)
antibody	anti-mouse IgG, HRP (horse)	Cell Signaling Technology	Cell Signaling Technology:7076; RRID:AB_330924	(1:7500)
antibody	anti-RXRA (K8508) (mouse monoclonal)	R&D Systems	R&D Systems:PP-K8508-00; RRID:AB_2182738	(5 µg)
antibody	anti-H3K27Ac (rabbit polyclonal)	Abcam	Abcam:ab4729; RRID:AB_2118291	(0.4 µg)
recombinant DNA reagent	PPRE X3-TK-luc; DR1 reporter (plasmid)	Addgene; PMID 9539737	Addgene:1015	plasmid was deposited by Bruce Spiegelman
recombinant DNA reagent	pGL3-RARE-luciferase; DR5 reporter (plasmid)	Addgene; PMID 16818722	Addgene:13458	plasmid was deposited by T. Michael Underhill
recombinant DNA reagent	pRL-SV40 (plasmid)	Promega	Promega:E2231
recombinant DNA reagent	pCL-ampho (plasmid)	other		obtained from Dr. Charles Sawyers (MSKCC)
recombinant DNA reagent	VSVG (plasmid)	other		obtained from Dr. Charles Sawyers (MSKCC)
recombinant DNA reagent	pCMV6-XL4 RARA (plasmid)	OriGene	OriGene:SC119566
recombinant DNA reagent	pCMV6-XL4 PPARG (plasmid)	OriGene	OriGene:SC108192
recombinant DNA reagent	pCMV6-XL4 PPARG Q286P (plasmid)	this paper		Q286 was mutated via site-directed mutagenesis of pCMV6-XL4 PPARG
recombinant DNA reagent	pCMV6-XL4 PPARG E471A (plasmid)	this paper		E471 was mutated via site-directed mutagenesis of pCMV6-XL4 PPARG
recombinant DNA reagent	pCMV6-XL4 PPARG Y477S (plasmid)	this paper		Y477 was mutated via site-directed mutagenesis of pCMV6-XL4 PPARG
recombinant DNA reagent	pCMV6-XL4 PPARG Y477X (plasmid)	this paper		Y477 was deleted via site-directed mutagenesis of pCMV6-XL4 PPARG
recombinant DNA reagent	pCMV6-XL4 empty vector (plasmid)	this paper		generated by digesting pCMV6-XL4 PPARG with NotI to remove PPARG and by ligating the plasmid ends with T4 DNA ligase
recombinant DNA reagent	pBABE puro RXRA (plasmid)	Addgene	Addgene:11441	deposited by Ronald Kahn
recombinant DNA reagent	pBABE puro RXRA S427F (plasmid)	this paper		S427 was mutated via site-directed mutagenesis of pBABE puro empty vector
recombinant DNA reagent	pBABE puro RXRA S427Y (plasmid)	this paper		S427 was mutated via site-directed mutagenesis of pBABE puro empty vector
recombinant DNA reagent	pBABE puro RXRA E453A (plasmid)	this paper		E453 was mutated via site-directed mutagenesis of pBABE puro empty vector
recombinant DNA reagent	pBABE puro RXRA S427F/E453A (plasmid)	this paper		E453 was mutated via site-directed mutagenesis of pBABE puro RXRA S427F
recombinant DNA reagent	pBABE puro empty vector (plasmid)	this paper		generated by digesting pBABE puro RXRA with EcoRI to remove RXRA and by ligating the plasmid ends with T4 DNA ligase
recombinant DNA reagent	pCMV6-XL4 PPARD (plasmid)	this paper		Human PPARD was cloned from JMSU-1 epithelial bladder cancer cells and inserted into the pCMV6-XL4
recombinant DNA reagent	pCMV6-XL4 PPARD Y441S (plasmid)	this paper		Y441 was mutated via site-directed mutagenesis of pCMV6-XL4 PPARD
recombinant DNA reagent	pCMV6-XL4 PPARD Y441X (plasmid)	this paper		Y441 was deleted via site-directed mutagenesis of pCMV6-XL4 PPARD
sequence-based reagent	ON-TARGETplus Non-targeting Pool (siRNA)	Dharmacon	Dharmacon:D-001810-10-20
sequence-based reagent	ON-TARGETplus Human PPARG siRNA	Dharmacon	Dharmacon:L-003436-00-0005
sequence-based reagent	ON-TARGETplus Human PPARD siRNA	Dharmacon	Dharmacon:L-003435-00-0005
commercial assay or kit	Dual-Glo Luciferase Assay System	Promega	Promega:E2940
commercial assay or kit	CellTiter-Glo	Promega	Promega:G7571
commercial assay or kit	Ovation Ultraflow System V2	NuGen	NuGen:0344-32
chemical compound, drug	Pioglitazone	Sigma-Aldrich	Sigma-Aldrich:E6910
chemical compound, drug	GW 0742	Tocris	Tocris:2229
chemical compound, drug	SR 11237	Tocris	Tocris:3411
chemical compound, drug	all-trans-Retinoic Acid (ATRA)	Sigma-Aldrich	Sigma-Aldrich:R2625
chemical compound, drug	GSK 0660	Tocris	Tocris:3433
chemical compound, drug	ST247	Sigma-Aldrich	Sigma-Aldrich:SML0424
chemical compound, drug	T0070907	Cayman Chemical	Cayman Chemical:10026
software, algorithm	GROMACS 5.1.3	DOI: 10.1016/j.softx.2015.06.001	RRID:SCR_014565
software, algorithm	MSMBuilder 2.8	PMID: 22125474
software, algorithm	Chimera	PMID: 15264254; http://www.rbvi.ucsf.edu/chimera	RRID:SCR_004097
sequence-based reagent	mKDM6A Forward (primer)	this paper		5' CGAGAAAGGAAATGTGAGAGCAAGG 3'
sequence-based reagent	mKDM6A Reverse 4 (primer)	this paper		5' CTGGCAGGATATGATAGCAATGTG 3'
sequence-based reagent	oIMR8543 (primer)	The Jackson Laboratory; https://www2.jax.org/protocolsdb/f?p=116:2:0::NO:2:P2_MASTER_PROTOCOL_ID,P2_JRS_CODE:3226,008462		5' GGTTAAACCCAGCTTGACCA 3'
sequence-based reagent	oIMR8544 (primer)	The Jackson Laboratory; https://www2.jax.org/protocolsdb/f?p=116:2:0::NO:2:P2_MASTER_PROTOCOL_ID,P2_JRS_CODE:3226,008462		5' GGAGGCAGAGACAGTTGGAG 3'
sequence-based reagent	PPARD.qPCR.Fwd.1 (primer)	this paper		5' ATGCACCAACGAGGCTGATG 3'
sequence-based reagent	PPARD.qPCR.Rev.1 (primer)	this paper		5' CTGCTCCATGGCTGATCTCC 3'
sequence-based reagent	PPARG fwd1 (primer)	this paper		5' ATGCCTTGCAGTGGGGATGTC 3'
sequence-based reagent	PPARG rev1 (primer)	this paper		5' GAGGTCAGCGGACTCTGGATTC 3'
sequence-based reagent	hPLIN2 fwd1 (primer)	this paper		5' AGTGCTCTGCCCATCATCCAG 3'
sequence-based reagent	hPLIN2 rev1 (primer)	this paper		5' TCACAGCGCCTTTGGCAT TG 3'
sequence-based reagent	FABP4 fwd1 (primer)	this paper		5' ACTGCAGCTTCCTTCTCACCTTG 3'
sequence-based reagent	FABP4 rev1 (primer)	this paper		5' TGCCAGCCACTTTCCTGGTG 3'
sequence-based reagent	mPlin2 Fwd1 (primer)	this paper		5' GTGCCCTGCCCATCATCC 3'
sequence-based reagent	mPlin2 Rev1 (primer)	this paper		5' TTACGGCACCTCTGGCACTG 3'
sequence-based reagent	mFabp4 Fwd1 (primer)	this paper		5' TGCAGCCTTTCTCACCTGGAAG 3'
sequence-based reagent	mFabp4 Rev1 (primer)	this paper		5' GCCTGCCACTTTCCTTGTGG 3'
sequence-based reagent	RXRA fwd1 (primer)	this paper		5' ACAAGACGGAGCTGGGCTG 3'
sequence-based reagent	RXRA rev2 (primer)	this paper		5' GGCTGCTCTGGGTACTTGTGC 3'
sequence-based reagent	RXRA E453A SDM For (primer)	this paper		5' acaccttccttatggccatgctggaggcgccg 3'
sequence-based reagent	RXRA E453A SDM Rev (primer)	this paper		5' cggcgcctccagcatggccataaggaaggtgt 3'
sequence-based reagent	RXRa S427F-F (primer)	this paper		5' CCG GCT CTG CGC TTT ATC GGG CTC AAA T 3'
sequence-based reagent	RXRa S427F-R (primer)	this paper		5' CAT TTG AGC CCG ATA AAG CGC AGA GCC G 3'
sequence-based reagent	RXRa S427Y-F (primer)	this paper		5' CCG GCT CTG CGC TAT ATC GGG CTC AAA T 3'
sequence-based reagent	RXRa S427Y-R (primer)	this paper		5' CAT TTG AGC CCG ATA TAG CGC AGA GCC G 3'
sequence-based reagent	F hPPARGQ286P (primer)	this paper		5' ccacggagcgaaacgggcagccctgaaag 3'
sequence-based reagent	R hPPARGQ286P (primer)	this paper		5' ctttcagggctgcccgtttcgctccgtgg 3'
sequence-based reagent	F hPPARGE471A (primer)	this paper		5' agtccttgtagatcgcctgcaggagcggg 3'
sequence-based reagent	R hPPARGE471A (primer)	this paper		5' cccgctcctgcaggcgatctacaaggact 3'
sequence-based reagent	PPARG Y477S For SDM (primer)	this paper		5' GAGATCTACAAGGACTTGAGCTAGCAGAGAGTCCTGAGC 3'
sequence-based reagent	PPARG Y477S Rev SDM (primer)	this paper		5' GCTCAGGACTCTCTGCTAGCTCAAGTCCTTGTAGATCTC 3'
sequence-based reagent	PPARG Y477X For SDM (primer)	this paper		5' GATCTACAAGGACTTGTAGTAGCAGAGAGTCCTGA 3'
sequence-based reagent	PPARG Y477X Rev SDM (primer)	this paper		5' TCAGGACTCTCTGCTACTACAAGTCCTTGTAGATC 3'
sequence-based reagent	PPARD Y441S For (primer)	this paper		5' AGATCTACAAGGACATGAGCTAACGGCGGCACCCAG 3'
sequence-based reagent	PPARD Y441S Rev (primer)	this paper		5' CTGGGTGCCGCCGTTAGCTCATGTCCTTGTAGATCT 3'
sequence-based reagent	PPARD Y441X For (primer)	this paper		5' GATCTACAAGGACATGTGATAACGGCGGCACCCAGG 3'
sequence-based reagent	PPARD Y441X Rev (primer)	this paper		5' CCTGGGTGCCGCCGTTATCACATGTCCTTGTAGATC 3'
